# Supplementary material for: Amine Modification of Silica Aerogels/Xerogels for Removal of Relevant Environmental Pollutants
Source: PubMed Central journal article supplement (PMC6833102; doi:10.3390/molecules24203701), 2019-10-15
Supplement: molecules-24-03701-s001.pdf [file molecules-24-03701-s001.pdf]

Article

# Amine modification of silica aerogels/xerogels for removal of relevant environmental pollutants

Alyne Lamy-Mendes <sup>1,2</sup>, Rafael B. Torres <sup>1</sup>, João P. Vareda <sup>1</sup>, David Lopes <sup>1</sup>, Marco Ferreira <sup>1</sup>, Vanessa Valente <sup>1</sup>, Ana V. Girão <sup>2</sup>, Artur J. M. Valente <sup>3</sup> and Luísa Durães <sup>1,\*</sup>

<sup>1</sup> CIEPQPF, Department of Chemical Engineering, University of Coimbra, 3030-790 Coimbra, Portugal

<sup>2</sup> CICECO - Aveiro Institute of Materials, Department of Materials and Ceramic Engineering, University of Aveiro, 3810-193 Aveiro, Portugal

<sup>3</sup> CQC, Department of Chemistry, University of Coimbra, 3004-535 Coimbra, Portugal

\* Corresponding author: luisa@eq.uc.pt (L. Durães).

## Supplementary Material

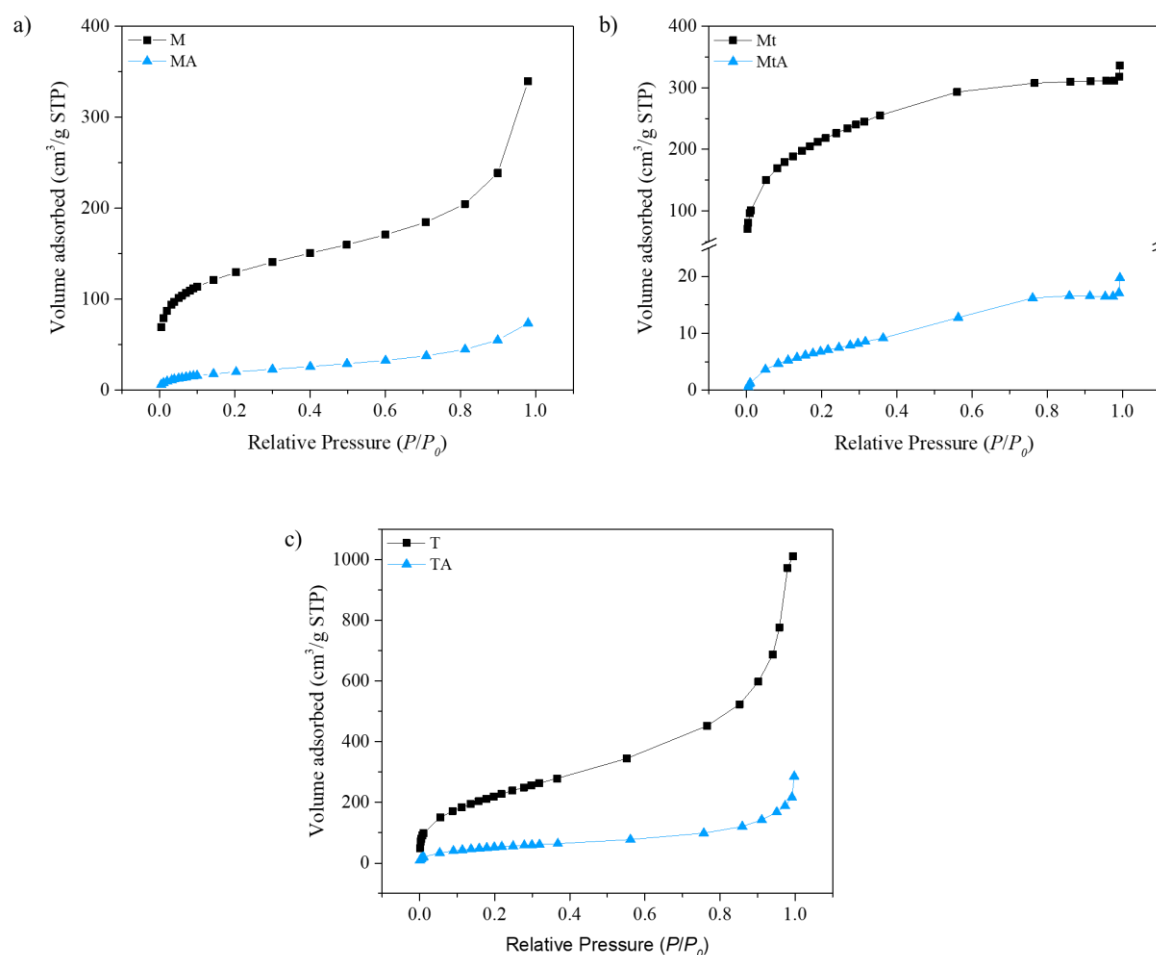

**Figure 1.** Comparative N<sub>2</sub> sorption isotherms of the adsorbents with and without amine modification for (a) volatile organic compounds, (b) heavy metals and (c) dyes.

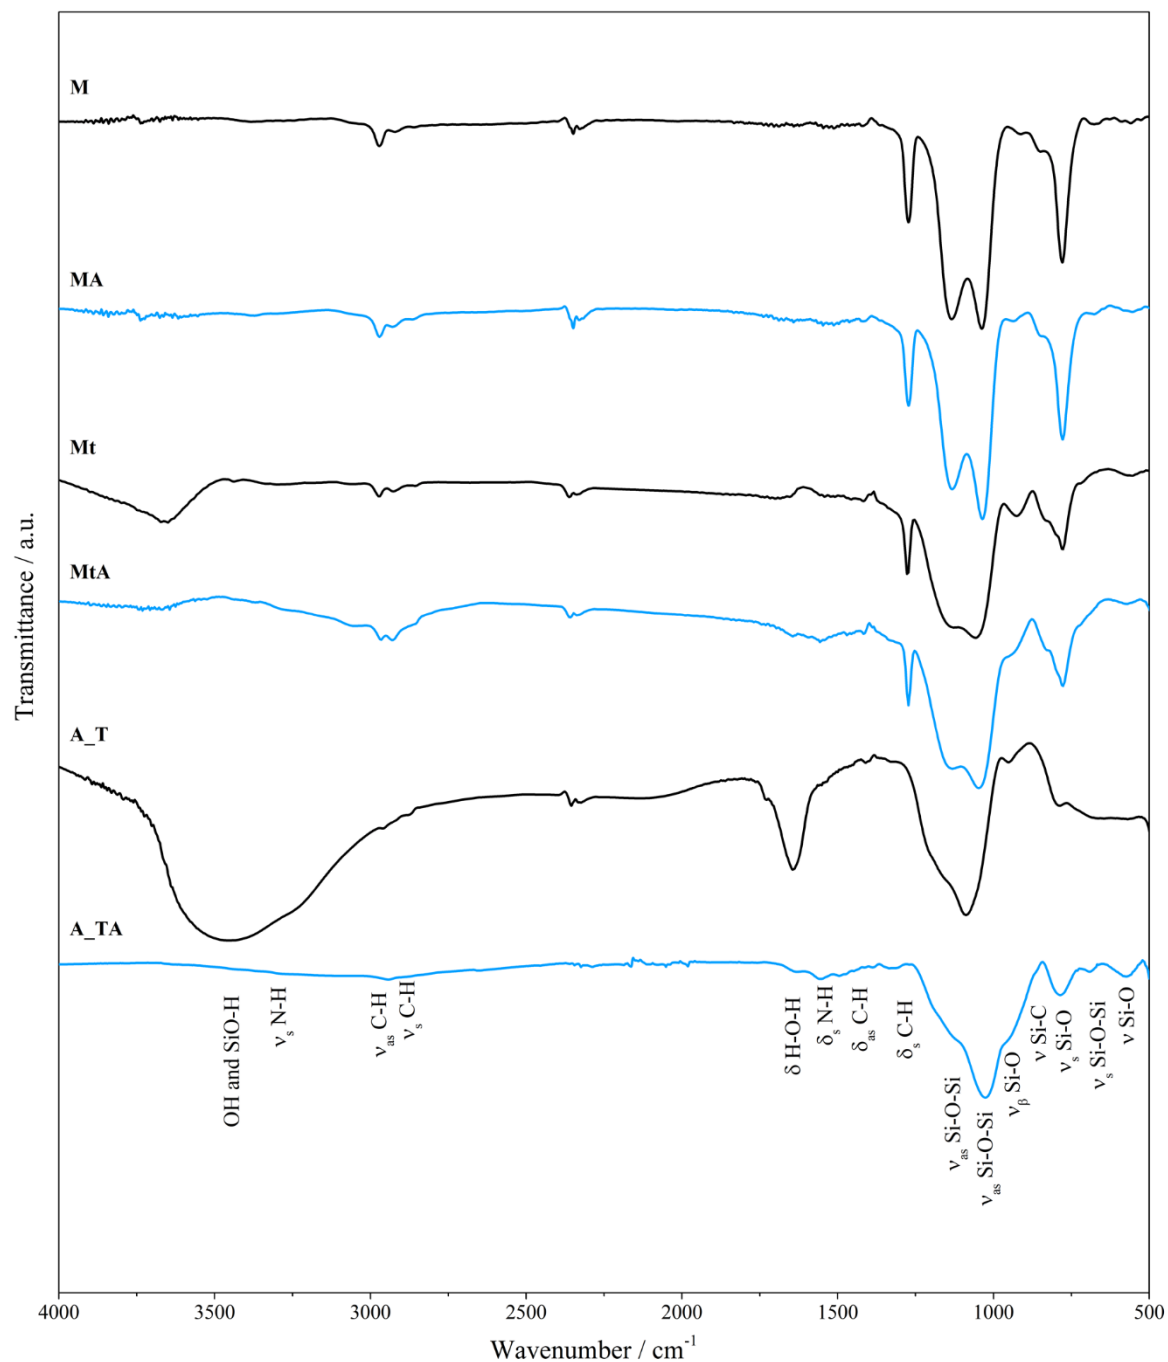

**Figure 2.** FTIR spectra of adsorbent materials ( $\nu$ —stretching vibration,  $\nu_s$ —symmetric stretching vibration;  $\nu_{as}$ —asymmetric stretching vibration;  $\nu_\beta$ —in-plane stretching vibration;  $\delta$ —bending vibration;  $\delta_s$ —symmetric deformation vibration (bending);  $\delta_{as}$ —asymmetric deformation vibration (bending)).

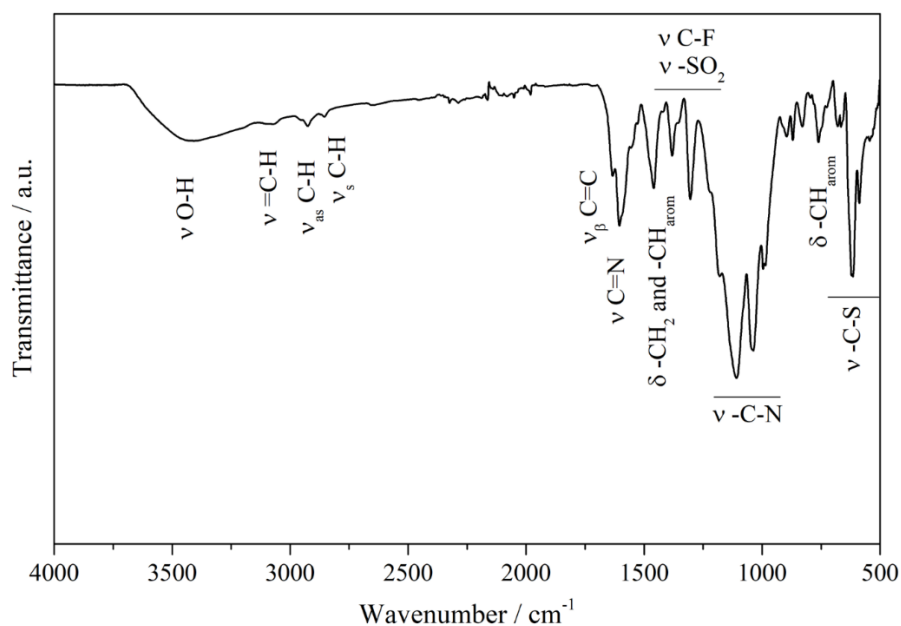

**Figure 3.** FTIR spectrum of *Rubi Levafix CA* ( $\nu$ —stretching vibration,  $\nu_s$ —symmetric stretching vibration;  $\nu_{as}$ —asymmetric stretching vibration;  $\nu_{\beta}$ —in-plane stretching vibration;  $\delta$ —bending vibration;  $\delta_s$ —symmetric deformation vibration (bending);  $\delta_{as}$ —asymmetric deformation vibration (bending)).
